# Supplementary material for: Theoretical study of synergistic effects between anion–π and metal–Lp interactions
Source: Royal Society of Chemistry journal article supplement (doi:10.1039/c5ra12802a), 2015-01-01

## Supporting information

Table S1 The most positive electrostatic potential ( $V_{\max}$ , kcal/mol) on the ring central point in the  $\pi$  molecule at the 0.001 electrons Bohr<sup>-3</sup> of the monomers (**1-3**) and dyads (**13-21**) as well as its difference between them ( $\Delta V_{\max}$ , kcal/mol).

|           | $V_{\max}$ | $\Delta V_{\max}$ |
|-----------|------------|-------------------|
| <b>1</b>  | 4.58       | ---               |
| <b>2</b>  | 10.18      | ---               |
| <b>3</b>  | 12.11      | ---               |
| <b>13</b> | 56.35      | 51.77             |
| <b>14</b> | 57.17      | 52.59             |
| <b>15</b> | 55.97      | 51.39             |
| <b>16</b> | 40.54      | 30.36             |
| <b>17</b> | 41.98      | 31.80             |
| <b>18</b> | 40.35      | 30.17             |
| <b>19</b> | 52.08      | 39.97             |
| <b>20</b> | 50.83      | 38.72             |
| <b>21</b> | 50.20      | 38.09             |

Table S2 The most negative electrostatic potential ( $V_{\min}$ , kcal/mol) at the N/O atomic surface of the  $\pi$  molecule at the 0.001 electrons Bohr<sup>-3</sup> in the monomers (**1-3**) and dyads (**4-12**) as well as its difference between them ( $\Delta V_{\min}$ , kcal/mol).

|           | $V_{\min}$ | $\Delta V_{\min}$ |
|-----------|------------|-------------------|
| <b>1</b>  | -29.62     | ---               |
| <b>2</b>  | -30.56     | ---               |
| <b>3</b>  | -26.10     | ---               |
| <b>4</b>  | -103.54    | -73.92            |
| <b>5</b>  | -99.15     | -69.53            |
| <b>6</b>  | -97.26     | -67.65            |
| <b>7</b>  | -87.60     | -57.04            |
| <b>8</b>  | -84.59     | -54.03            |
| <b>9</b>  | -83.65     | -53.09            |
| <b>10</b> | -99.15     | -73.04            |
| <b>11</b> | -90.99     | -64.88            |
| <b>12</b> | -89.73     | -63.63            |

Table S3 Second-order perturbation energies ( $E^2$ , kcal/mol) for the metal-Lp interaction in the complexes **13-21** at the HF/aug-cc-pVDZ(PP) level.

| Complexes          | $E^2(1)$ | $E^2(2)$ | $E^2(3)$ |
|--------------------|----------|----------|----------|
| <b>13(1+2CuCN)</b> | 15.41    | 103.62   | 3.76     |
| <b>14(1+2AgCN)</b> | 21.40    | 11.32    | 2.80     |
| <b>15(1+2AuCN)</b> | 46.83    | 15.49    | 5.94     |
| <b>16(2+2CuCN)</b> | 11.70    | 119.66   | 6.80     |
| <b>17(2+2AgCN)</b> | 27.59    | 32.65    | 4.75     |
| <b>18(2+2AuCN)</b> | 78.00    | 29.04    | 10.02    |
| <b>19(3+2CuCN)</b> | 6.40     | 95.41    | 3.85     |
| <b>20(3+2AgCN)</b> | 17.28    | 16.14    | 2.02     |
| <b>21(3+2AuCN)</b> | 53.34    | 8.85     | 4.43     |

Note:  $E^2(1)$ ,  $E^2(2)$ , and  $E^2(3)$  correspond to the orbital interactions of  $Lp_{(N/O)} \rightarrow BD^*_{(C-M)}$ ,  $Lp_{(N/O)} \rightarrow Lp^*_{(M)}$ , and  $Lp_{(M)} \rightarrow BD^*_{(C-N/C-O)}$ , respectively.

Table S4 Interaction energy of the anion-metal interaction ( $\Delta E_{\text{far}}$ , kcal/mol) and equilibrium distances ( $R$ , Å) in the complexes **22-46** as well as their changes ( $\Delta R$ , Å) relative to the complexes **4-21**

| Complexes | $R_1$ | $R_2$ | $\Delta R_1$ | $\Delta R_2$ | $\Delta E_{\text{far}}$ |
|-----------|-------|-------|--------------|--------------|-------------------------|
| <b>22</b> | 2.372 | 1.846 | -0.291       | 0.003        | -38.25                  |
| <b>23</b> | 2.377 | 2.074 | -0.286       | -0.016       | -36.62                  |
| <b>24</b> | 2.364 | 2.027 | -0.300       | -0.006       | -33.04                  |
| <b>25</b> | 2.904 | 1.846 | -0.336       | 0.003        | -32.52                  |
| <b>26</b> | 2.907 | 2.077 | -0.333       | -0.013       | -31.73                  |
| <b>27</b> | 2.893 | 2.027 | -0.348       | -0.005       | -28.26                  |
| <b>28</b> | 3.056 | 1.845 | -0.338       | 0.002        | -31.18                  |
| <b>29</b> | 3.057 | 2.077 | -0.338       | -0.013       | -30.65                  |
| <b>30</b> | 3.041 | 2.027 | -0.353       | -0.006       | -27.34                  |
| <b>31</b> | 2.428 | 1.790 | -0.144       | 0.013        | -18.66                  |
| <b>32</b> | 2.430 | 2.032 | -0.142       | -0.006       | -18.10                  |
| <b>33</b> | 2.425 | 1.980 | -0.147       | 0.006        | -15.16                  |
| <b>34</b> | 2.982 | 1.789 | -0.165       | 0.012        | -17.11                  |
| <b>35</b> | 2.984 | 2.034 | -0.163       | -0.004       | -16.68                  |
| <b>36</b> | 2.982 | 1.979 | -0.165       | 0.005        | -13.81                  |
| <b>37</b> | 3.141 | 1.789 | -0.159       | 0.011        | -16.63                  |
| <b>38</b> | 3.148 | 2.034 | -0.152       | -0.004       | -16.25                  |
| <b>39</b> | 3.139 | 1.979 | -0.161       | 0.005        | -13.40                  |
| <b>40</b> | 1.653 | 1.801 | -0.564       | -0.007       | -35.43                  |
| <b>41</b> | 1.640 | 2.079 | -0.577       | -0.040       | -42.38                  |
| <b>42</b> | 1.438 | 2.058 | -0.779       | -0.006       | -32.38                  |
| <b>43</b> | 2.596 | 1.801 | -0.415       | -0.006       | -25.91                  |
| <b>44</b> | 2.636 | 2.077 | -0.375       | -0.042       | -23.91                  |
| <b>45</b> | 2.617 | 2.041 | -0.394       | -0.023       | -21.36                  |
| <b>46</b> | 2.767 | 1.800 | -0.429       | -0.007       | -24.65                  |
| <b>47</b> | 2.810 | 2.076 | -0.386       | -0.043       | -22.61                  |
| <b>48</b> | 2.727 | 2.052 | -0.469       | -0.012       | -20.17                  |

Table S5 Charge transfer in the anion- $\pi$  ( $CT_1$ , e) and metal-Lp ( $CT_2$ , e) interactions in the complexes **22-46** as well as their changes ( $\Delta CT$ , e) relative to the complexes **4-21**.

| Complexes | $CT_1$ | $CT_2$ | $\Delta CT_1$ | $\Delta CT_2$ |
|-----------|--------|--------|---------------|---------------|
| <b>22</b> | 0.0321 | 0.2654 | 0.0226        | 0.0396        |
| <b>23</b> | 0.0298 | 0.2266 | 0.0203        | 0.0412        |
| <b>24</b> | 0.0328 | 0.3398 | 0.0233        | 0.0654        |
| <b>25</b> | 0.0463 | 0.2548 | 0.0389        | 0.0290        |
| <b>26</b> | 0.0413 | 0.2148 | 0.0339        | 0.0294        |
| <b>27</b> | 0.0493 | 0.3248 | 0.0419        | 0.0504        |
| <b>28</b> | 0.0561 | 0.2532 | 0.0486        | 0.0274        |
| <b>29</b> | 0.0494 | 0.2130 | 0.0419        | 0.0276        |
| <b>30</b> | 0.0607 | 0.3224 | 0.0532        | 0.0480        |
| <b>31</b> | 0.0088 | 0.2630 | 0.0044        | 0.0378        |
| <b>32</b> | 0.0084 | 0.2002 | 0.0040        | 0.0360        |
| <b>33</b> | 0.0089 | 0.2886 | 0.0045        | 0.0564        |
| <b>34</b> | 0.0102 | 0.2568 | 0.0055        | 0.0316        |
| <b>35</b> | 0.0098 | 0.1940 | 0.0051        | 0.0298        |
| <b>36</b> | 0.0104 | 0.2802 | 0.0057        | 0.0480        |
| <b>37</b> | 0.0110 | 0.2550 | 0.0062        | 0.0298        |
| <b>38</b> | 0.0105 | 0.1926 | 0.0057        | 0.0284        |
| <b>39</b> | 0.0113 | 0.2780 | 0.0065        | 0.0458        |
| <b>40</b> | 0.2220 | 0.2282 | 0.1697        | 0.0540        |
| <b>41</b> | 0.2213 | 0.1522 | 0.1690        | 0.0518        |
| <b>42</b> | 0.3535 | 0.2682 | 0.3012        | 0.1204        |
| <b>43</b> | 0.1348 | 0.2134 | 0.1057        | 0.0392        |
| <b>44</b> | 0.1147 | 0.1372 | 0.0856        | 0.0368        |
| <b>45</b> | 0.1314 | 0.2026 | 0.1023        | 0.0548        |
| <b>46</b> | 0.1523 | 0.2132 | 0.1240        | 0.0390        |
| <b>47</b> | 0.1276 | 0.1378 | 0.0993        | 0.0374        |
| <b>48</b> | 0.1875 | 0.2282 | 0.1592        | 0.0804        |

Note:  $CT_1$  is the sum of **1** and the charge of the anion in the anion- $\pi$  interaction and  $CT_2$  is the absolute value of the sum of charge on all atoms of MCN in the metal-Lp interaction.

Table S6 Change of occupancy ( $\Delta n$ , e) on the selected orbitals in the multicomponent systems (**22-48**) as well as the isolated anion- $\pi$  and metal-Lp complexes (in parentheses) compared with monomers

| Complexes | $\Delta n_{N/O}$ | $\Delta n_M$     | $\Delta n^*_{C-M}$ |
|-----------|------------------|------------------|--------------------|
| <b>22</b> | -0.1149(-0.1049) | -0.0107(-0.0136) | 0.0229(0.0212)     |
| <b>23</b> | -0.0953(-0.0803) | -0.0107(-0.0115) | 0.0393(0.0374)     |
| <b>24</b> | -0.1621(-0.1431) | -0.0167(-0.0197) | 0.0621(0.0574)     |
| <b>25</b> | -0.1114          | -0.0111          | 0.0230             |
| <b>26</b> | -0.0906          | -0.0107          | 0.0388             |
| <b>27</b> | -0.1570          | -0.0171          | 0.0609             |
| <b>28</b> | -0.1109          | -0.0112          | 0.0231             |
| <b>29</b> | -0.0898          | -0.0108          | 0.0388             |
| <b>30</b> | -0.1562          | -0.0172          | 0.0608             |
| <b>31</b> | -0.1525(-0.1470) | 0.0094(-0.0158)  | 0.0162(0.0161)     |
| <b>32</b> | -0.1176(-0.1081) | -0.0123(-0.0136) | 0.0350(0.0341)     |
| <b>33</b> | -0.1832(-0.1729) | -0.0195(-0.0236) | 0.0558(0.0539)     |
| <b>34</b> | -0.1515          | -0.0131          | 0.0161             |
| <b>35</b> | -0.1162          | -0.0124          | 0.0347             |
| <b>36</b> | -0.1815          | -0.0199          | 0.0554             |
| <b>37</b> | -0.1512          | -0.0132          | 0.0160             |
| <b>38</b> | -0.1158          | -0.0124          | 0.0347             |
| <b>39</b> | -0.1811          | -0.0200          | 0.0553             |
| <b>40</b> | -0.0537(-0.0374) | -0.0092(-0.0145) | 0.0108(0.0098)     |
| <b>41</b> | -0.0127(-0.0003) | -0.0063(-0.0088) | 0.0287(0.0236)     |
| <b>42</b> | -0.0019(-0.0373) | -0.0115(-0.0166) | 0.0497(0.0549)     |
| <b>43</b> | -0.0490          | -0.0109          | 0.0106             |
| <b>44</b> | -0.0133          | -0.0090          | 0.0273             |
| <b>45</b> | -0.0720          | -0.0146          | 0.0665             |
| <b>46</b> | -0.0497          | -0.0112          | 0.0106             |
| <b>47</b> | -0.0129          | -0.0090          | 0.0274             |
| <b>48</b> | -0.1823          | -0.0072          | 0.0778             |

Figure S1 Relationship between the change of charge transfer and the cooperative energy.

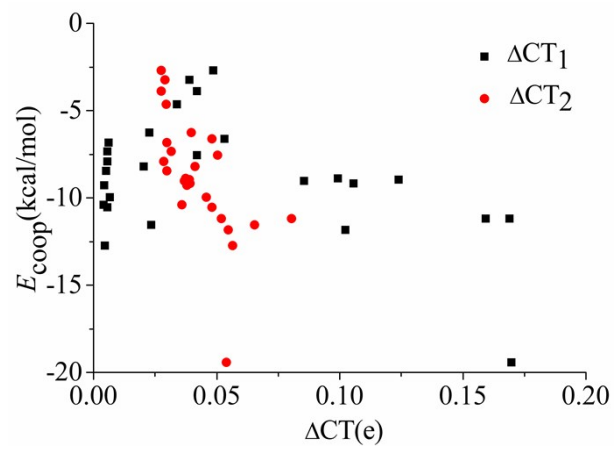

Supplement: c5ra12802a1.pdf [file c5ra12802a1.pdf]
